# Supplementary material for: The Gut Microbiota Metabolite Succinate Promotes Adipose Tissue Browning in Crohn’s Disease
Source: PubMed Central journal article supplement — J Crohns Colitis. 2022 May 12;16(10):1571–83. doi: 10.1093/ecco-jcc/jjac069 (PMC9624294; doi:10.1093/ecco-jcc/jjac069), 2022-05-12
Supplement: jjac069_suppl_supplementary_material.pdf [file jjac069_suppl_supplementary_material.pdf]

**Supplementary Table 1: Immunophenotypic profile of undifferentiated human adipose-derived stem cells (ASCs) isolated from control and CD subjects.** The values reflect the mean  $\pm$ SD percentage surface positive staining of ASCs for a part of surface antigens including hematopoietic and stromal markers.

| <b><i>Antibody</i></b> | <b>Control-ASCs</b> | <b>Active CD-ASCs</b> | <b>Inactive CD-ASCs</b> |
|------------------------|---------------------|-----------------------|-------------------------|
| <b>CD34</b>            | 1.2 $\pm$ 0,8       | 0,1 $\pm$ 0,05        | 0,2 $\pm$ 0,1           |
| <b>CD45</b>            | 2 $\pm$ 1           | 0,1 $\pm$ 0,05        | 0,1 $\pm$ 0,1           |
| <b>CD73</b>            | 94 $\pm$ 6          | 98,3 $\pm$ 0,5        | 96 $\pm$ 0,5            |
| <b>CD90</b>            | 94 $\pm$ 8          | 96,3 $\pm$ 0,9        | 95,9 $\pm$ 1,1          |
| <b>CD105</b>           | 99 $\pm$ 2          | 99 $\pm$ 1            | 98 $\pm$ 0,5            |

**Supplementary Table 2.** TaqMan™ probes used in real-time PCR gene expression analysis.

|                                   |                  |                                    |               |
|-----------------------------------|------------------|------------------------------------|---------------|
| <b><i>TCA cycle</i></b>           | <i>SUCNR1</i>    | Succinate receptor 1               | Hs00263701_m1 |
| <b><i>Browning markers</i></b>    | <i>ADRB3</i>     | Adrenergic, Beta-3-, Receptor      | Hs00609046_m1 |
|                                   | <i>COX7A1</i>    | Cytochrome C Oxidase Subunit 7A1   | Hs03045102_g1 |
|                                   | <i>CPT1B</i>     | Carnitine Palmitoyltransferase 1B  | Hs00189258_m1 |
|                                   | <i>ELOVL3</i>    | ELOVL Fatty Acid Elongase 3        | Hs00537016_m1 |
|                                   | <i>FOXC2</i>     | Forkhead Box C2                    | Hs00270951_s1 |
|                                   | <i>PPARGC1A</i>  | PPARG Coactivator 1 Alpha          | Hs00173304_m1 |
|                                   | <i>PPARGC1B</i>  | PPARG Coactivator 1 Beta           | Hs00993805_m1 |
|                                   | <i>PRDM16</i>    | PR/SET Domain 16                   | Hs00223161_m1 |
|                                   | <i>TBX1</i>      | T-Box Transcription Factor 1       | Hs00962558_g1 |
|                                   | <i>TMEM26</i>    | Transmembrane Protein 26           | Hs00415619_m1 |
|                                   | <i>UCP-1</i>     | Uncoupling Protein 1               | Hs01084772_m1 |
| <b><i>Inflammation</i></b>        | <i>IL6</i>       | Interleukin-6                      | Hs00985639_m1 |
|                                   | <i>TNFA</i>      | Tumor Necrosis Factor Alpha        | Hs00174128_m1 |
|                                   | <i>IL1B</i>      | Interleukin 1 Beta                 | Hs01555410_m1 |
| <b><i>Chemokines</i></b>          | <i>MCP1/CCL2</i> | Monocyte chemoattractant protein-1 | Hs00234140_m1 |
| <b><i>Phagocytosis marker</i></b> | <i>RAB5A</i>     | Ras-related protein Rab-5A         | Hs00702360_s1 |
| <b><i>Housekeeping gene</i></b>   | <i>18S</i>       | Eukaryotic 18S ribosomal RNA       | Hs99999901_s1 |

**Supplementary Table 3.** Bio-impedance measurements of the subcohort used for the infrared thermography study.

|                           | Healthy Control<br>(n= 12) | Crohn disease<br>(n=11)    |                   |
|---------------------------|----------------------------|----------------------------|-------------------|
|                           |                            | Active<br>(n=5)            | Inactive<br>(n=6) |
| Sex (male/female)         | (3/9)                      | (1/4)                      | (3/3)             |
| Age                       | 41.41 ± 13.13              | 49.8 ± 23.12               | 33.66 ± 10.03     |
| BMI (kg/m <sup>2</sup> )  | 23.40 ± 2.37               | 20.61 ± 2.58               | 25.79 ± 4.78      |
| FFMI (kg/m <sup>2</sup> ) | 15.92 ± 1.88               | 15.6 ± 2.53                | 17.45 ± 1.55      |
| FMI (kg/m <sup>2</sup> )  | 7.15 ± 2.02                | 4.76 ± 2.40                | 8,18 ± 4.62       |
| VAT (l)                   | 1.42 ± 0.9                 | 0.72 ± 0.65                | 1.40 ± 0.58       |
| SMM (kg)                  | 21.24 ± 6.65               | 17.48 ± 4.17 <sup>b</sup>  | 24.76 ± 5.59      |
| Phase angle (°)           | 6.15 ± 0.77                | 5,14 ± 1.56 <sup>a,b</sup> | 6.8 ± 0.61        |

Abbreviations: BMI. body mass index; FFMI. fat free mass index; FMI. fat mass index; SMM. skeletal muscle mass; VAT. visceral adipose tissue.

<sup>a</sup> P <0,05 significant differences compared with healthy control ; <sup>b</sup> P <0,05 significant differences compared with patients in remission of the disease.

A.

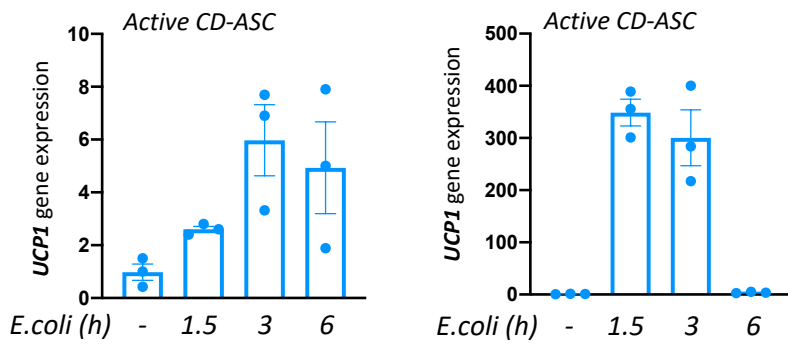

B.

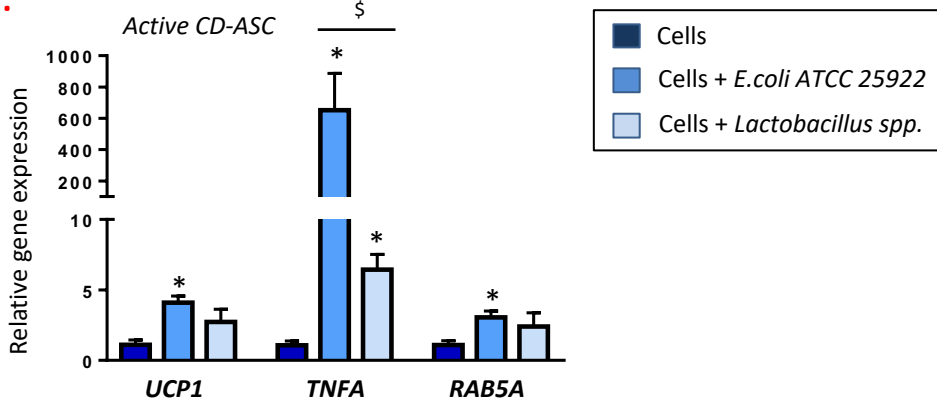

C.

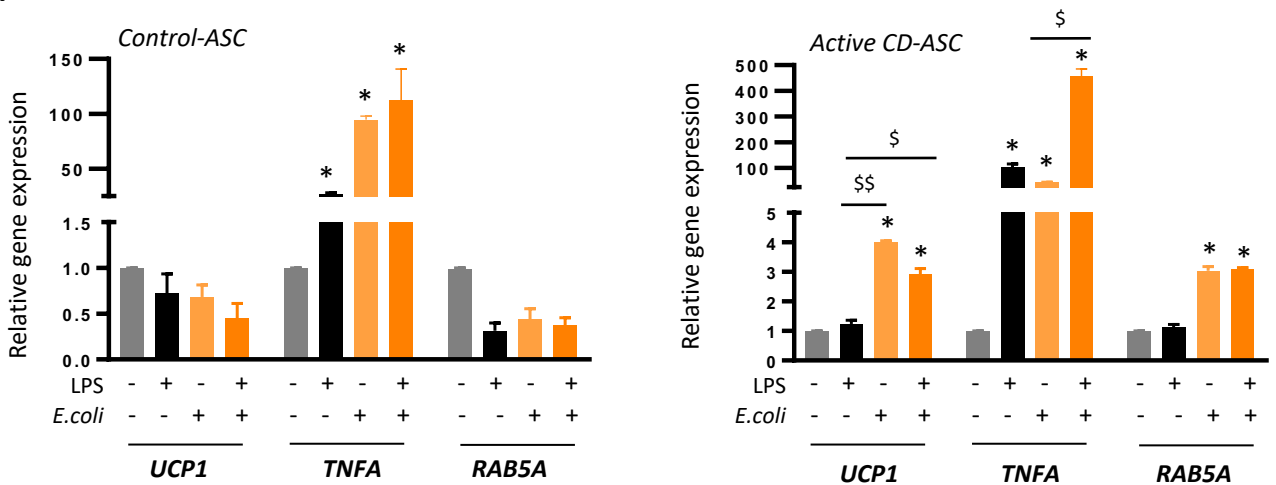

**Supplementary Figure 1. Acute inflammatory stimulus is not enough to increase UCP-1 gene expression in adipose-stem cells from healthy individuals. (A)** Time-course of *E.coli* infection in adipose-stem cells isolated from CD patients **(B)** Relative gene expression of the browning marker *UCP1*, inflammatory marker *TNFA* and phagocytic marker *RAB5A* in ASC isolated from VAT of active CD patients and co-cultured with *E.coli* ATCC 25922 or *Lactobacillus* spp. for 3 hours. **(C)** ASC isolated from healthy individuals (control group) or active CD patients were treated with LPS at 100 ng/ml for 1 hour and then were infected with *E.coli* or not for 3 hours. The gene expression of the *UCP1*, *TNFA* and *RAB5A* were studied. Bars in graphs represent mean  $\pm$  SEM. Data are representative of three independent experiments. \* $P < 0.05$  versus control; \$ $P < 0.05$  and \$\$ $P < 0.01$  as indicated in the figure.

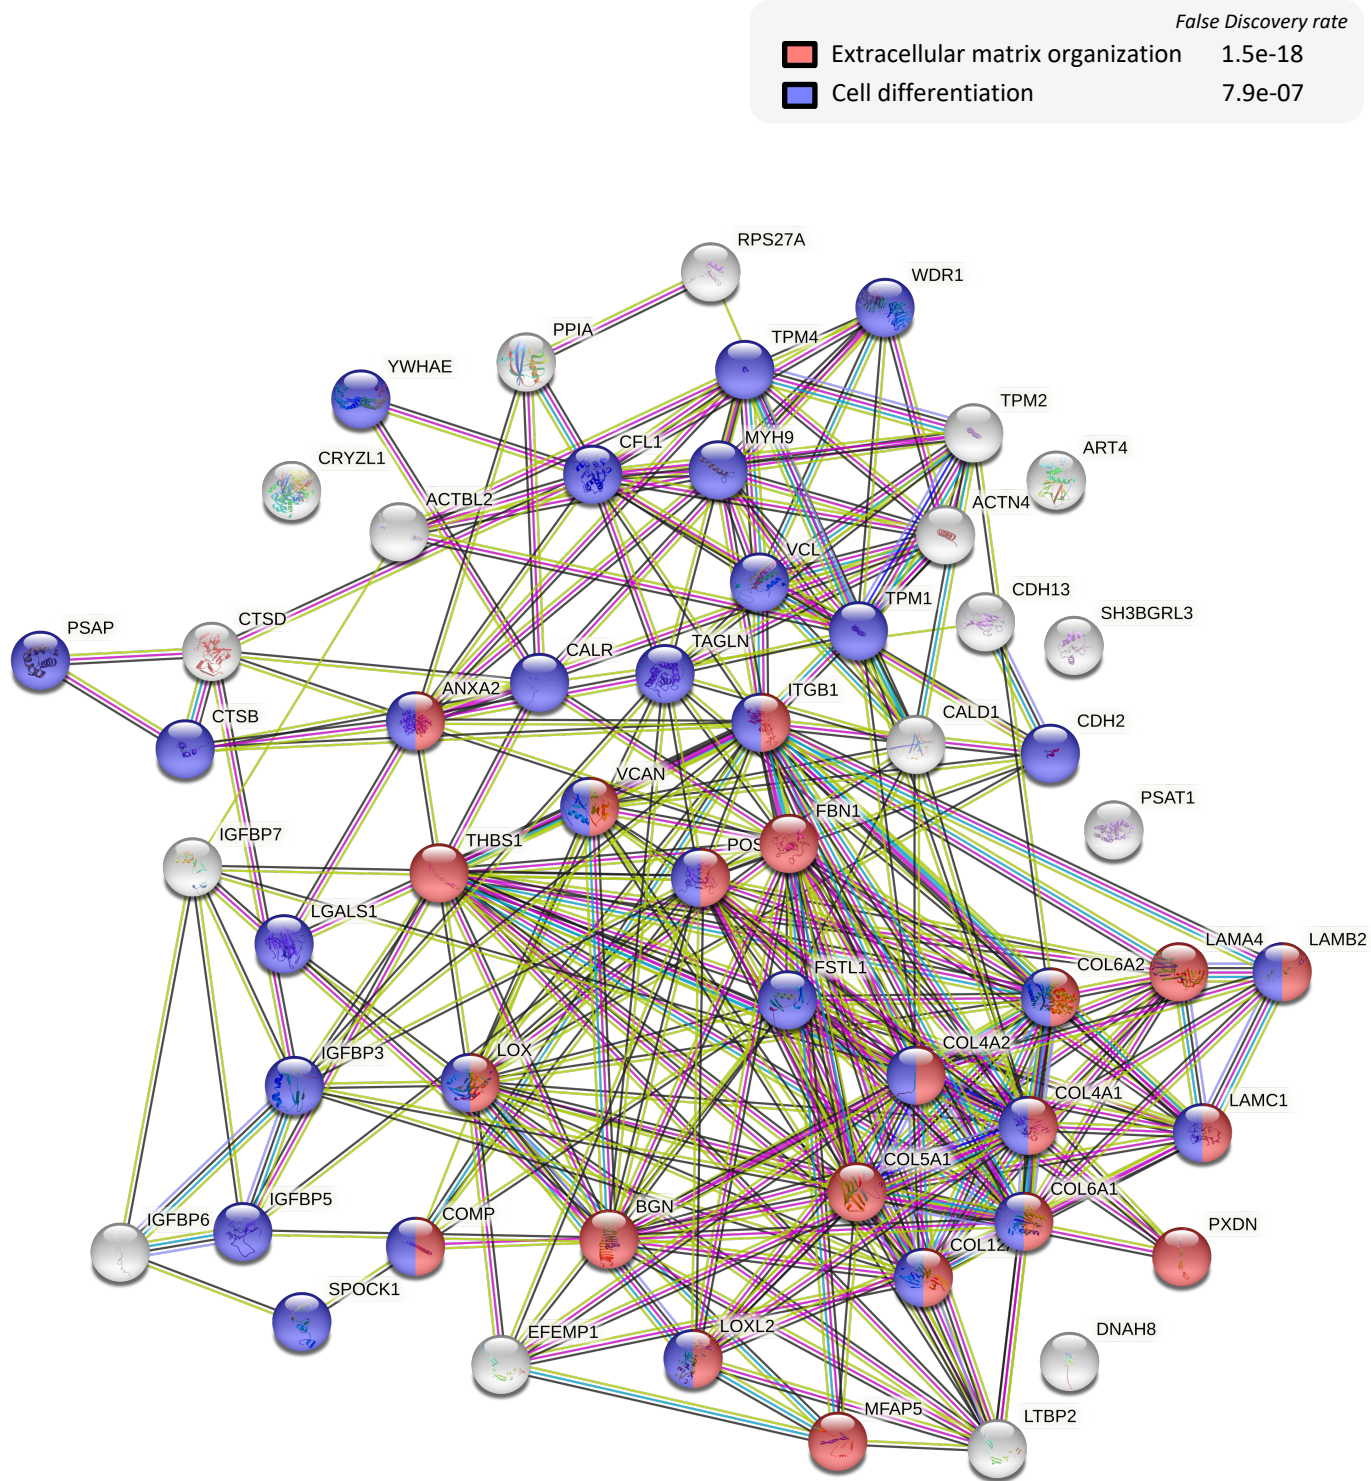

**Supplementary Figure 2. Protein-protein interaction network of up-regulated proteins in adipose-stem cells of CD patients.** The integrated functional network built from proteins up-regulated in adipose-stem cells of CD patients. The densely connected sub-networks extracted using STRING from the total network are shown in different colours. Number of nodes: 55; number of edges: 268; number of expected edges: 28; PPI enrichment p-value: <math><1.0e-16</math>.
